# Supplementary material for: High-Dose Resveratrol Supplementation in Obese Men: An Investigator-Initiated, Randomized, Placebo-Controlled Clinical Trial of Substrate Metabolism, Insulin Sensitivity, and Body Composition
Source: PubMed Central journal article supplement — Diabetes. 2013 Mar 14;62(4):1186–95. doi: 10.2337/db12-0975 (PMC3609591; doi:10.2337/db12-0975), 2013-03-14

SUPPLEMENTARY DATA

**Supplementary Table 1.** Primer sequences used for quantitative real-time RT- PCR

| Gene                    | Sense 5'---3'          | Antisense 5'---3'         |
|-------------------------|------------------------|---------------------------|
| CD14                    | TAAAGGACTGCCAGCCAAGC   | AGCCAAGGCAGTTTGAGTCC      |
| CD68                    | ATGATGAGAGGCAGCAAGATGG | GCTACATGGCGGTGGAGTACAA    |
| TNF $\alpha$            | GCTGCACTTTGGAGTGATCG   | TTGAGGGTTTGCTACAACATGGG   |
| IL6                     | GGATTCAATGAGGAGACTTGC  | TTTTGTACTCATCTGCACAGC     |
| MCP1                    | AGCCAGATGCAATCAATGCC   | GTCTTGAAGATCACAGCTTCTTTGG |
| CPT1                    | TTATCAACAAGCCAGACCCC   | TATAATCCCCGTCTCAGGGC      |
| NF-kB                   | AAGTATTTCAACCACAGATGGC | TGCAGATTTTGACCTGAGGG      |
| Adiponectin             | AGATCCAGGTCTTATTGGTCC  | GAGCGGTATACATAGGCACC      |
| IL8                     | ACTCCAAACCTTTCCACCCC   | CTCAGCCCTCTTCAAAACTTCTCC  |
| CIDEA                   | CGGCTGCCTTAACGTGAA     | AGATGAGAAACTGTCCCATCA     |
| UCP2                    | CCTCATGACAGATGACCTCC   | TGTATCTCGTCTTGACCACG      |
| UCP3                    | CTACAAGGGATTTACACCCTCC | CTTAACTGGTTTCGGACACG      |
| GLUT4                   | CCCCATTCTTGGTTCATCG    | ATAGCCTCCGCAACATACTGG     |
| PGC1 $\alpha$           | TTGAAGAGCGCCGTGTGATT   | TGTCTCCATCATCCCGCAGAT     |
| $\beta$ 2-microglobulin | GAGGCTATCCAGCGTACTCC   | AATGTCGGATGGATGAAACCC     |

**Supplementary Table 2.** Adverse events

|              | PLACEBO | RESVERATROL |
|--------------|---------|-------------|
| Flatulence   | 1       | 1           |
| Loose stool  | 1       | 0           |
| Reflux       | 1       | 2           |
| Palpitations | 1       | 0           |
| Rash         | 0       | 1           |

Absolute number of adverse events reported during the trial period. According to the National Cancer Institute Common Terminology Criteria for Adverse Events (CTCAE) all events were grade 1.

**Supplementary Table 3.** Urine resveratrol metabolites

|                                         | PLACEBO        | RESVERATROL      |
|-----------------------------------------|----------------|------------------|
| RSV glucuronide, isomer 1 ( $\mu$ g/ml) | Not detectable | 219.2 $\pm$ 44.5 |
| RSV glucuronide, isomer 2 ( $\mu$ g/ml) | Not detectable | 82.7 $\pm$ 19.0  |
| RSV disulphate ( $\mu$ g/ml)            | Not detectable | 1.54 $\pm$ 0.38  |
| RSV monosulphate ( $\mu$ g/ml)          | Not detectable | 271.3 $\pm$ 39.5 |

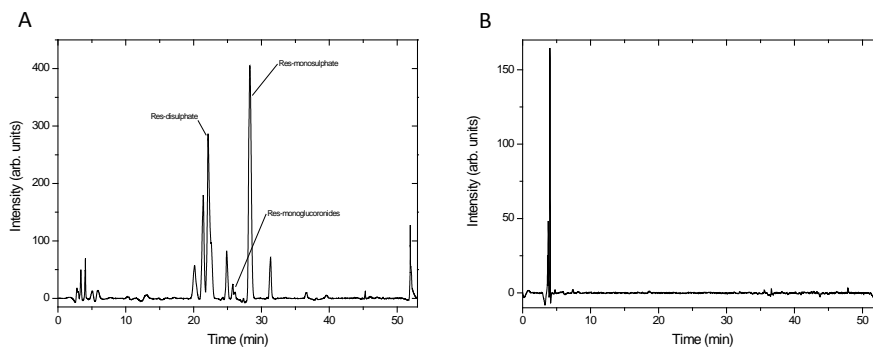

## SUPPLEMENTARY DATA

Main urine resveratrol metabolites at the end of the treatment period ( $t=4$  weeks). Values are given as mean  $\pm$ SEM. Figures are representative HPLC-DAD chromatograms ( $\lambda=300$  nm) of urine samples from subjects receiving resveratrol (A) or placebo (B) treatment.

### Supplementary Figure 1. Full day metabolic investigation

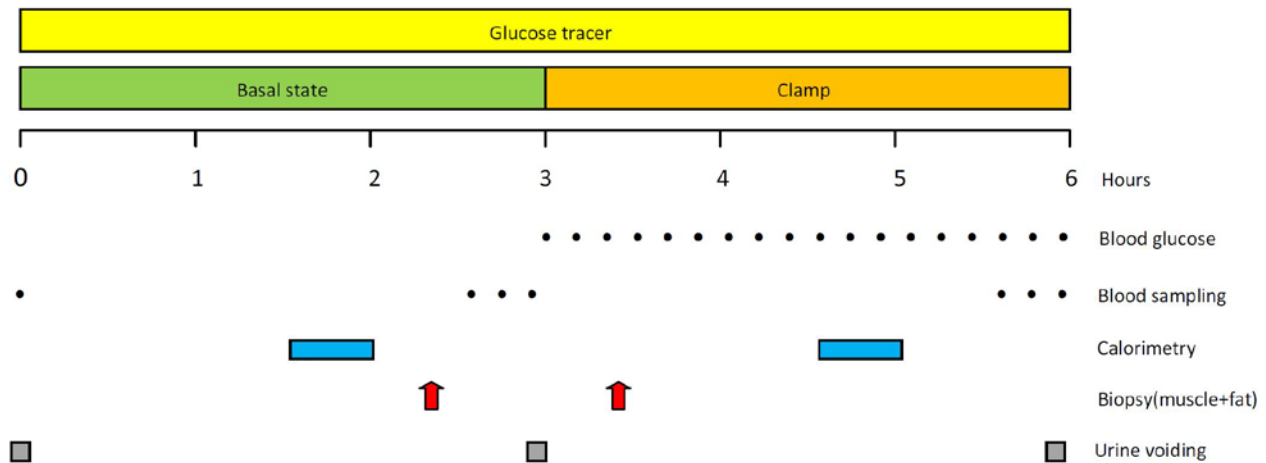

### Supplementary Figure 2. Trial profile

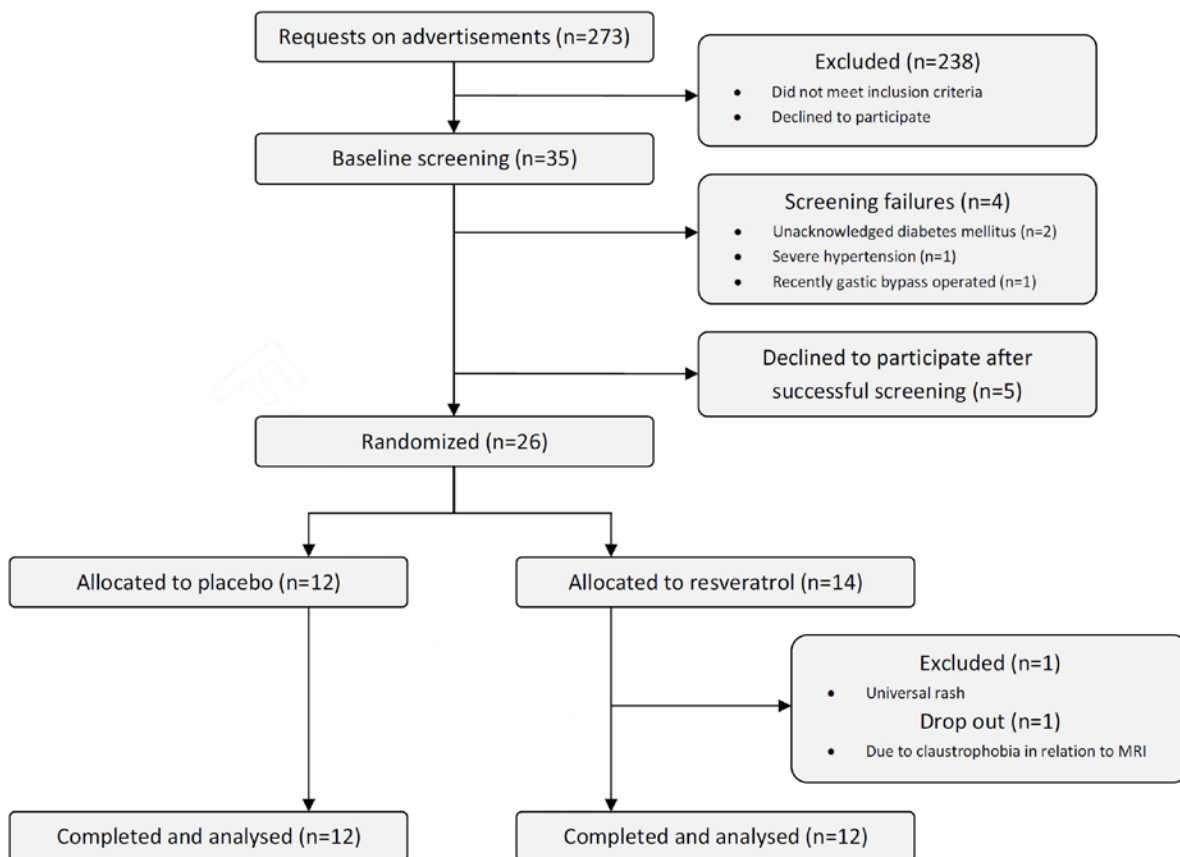

SUPPLEMENTARY DATA

**Supplementary Figure 3.** Pharmacokinetics. Absorption profile after ingestion of 500 mg Fluxome trans-resveratrol (N=3) or 500 mg ResVida trans-resveratrol (N=3). Plasma concentrations assessed by HPLC. Data points represent means  $\pm$  SEM

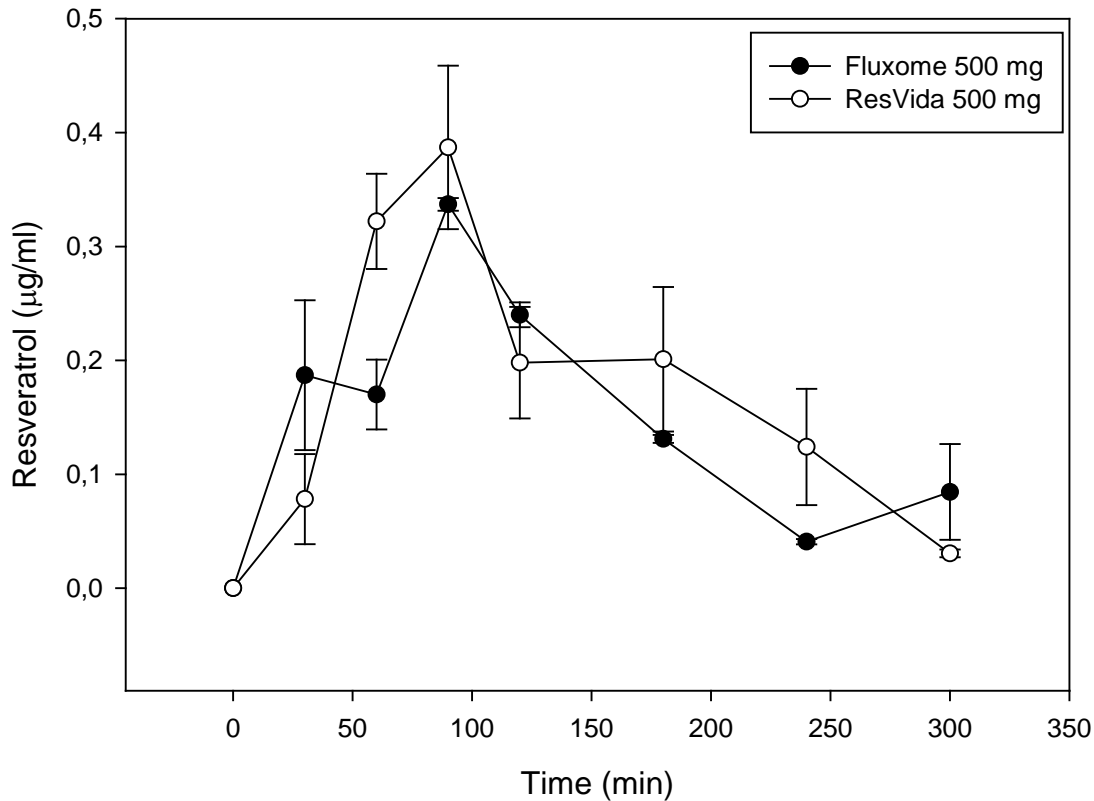

**Supplementary Figure 4.** Gene expression and protein phosphorylation. Intracellular protein levels and relative mRNA expression in muscle and adipose tissue biopsies taken before and after 4 weeks treatment with placebo (N=12) or resveratrol (N=12). Biopsies were taken ahead of and during (20 minutes after initiation) a hyperinsuliemic euglycemic clamp. Throughout the figure filled bars indicate placebo group and open bars indicate resveratrol group. Results are presented as group means  $\pm$  SEM, and overall comparisons of potential treatment effects were performed by two way repeated measures ANOVA in basal and clamp situation, respectively. **A:** Relative UCP3 mRNA expression in muscle tissue assessed by RT-PCR **B-K:** Relative mRNA expression of CPT1, UCP2, UCP3, IL6, IL8, adiponectin, MCP1, CD14, CD68 and CIDEA in subcutaneous adipose tissue assessed by RT-PCR. **L:** Phosphorylation of the intracellular kinase acetyl-CoA carboxylase (ACC) assessed by western blot analysis in muscle tissue. **M:** Phosphorylation of SIRT1 assessed by western blot analysis in muscle tissue. **N-S:** Acetylation of lysine residues assessed by western blot analysis in muscle tissue; separated analysis of the six major bands comprising the total acetylation illustrated in *Figure 5 / Gene expression and protein phosphorylation*

# SUPPLEMENTARY DATA

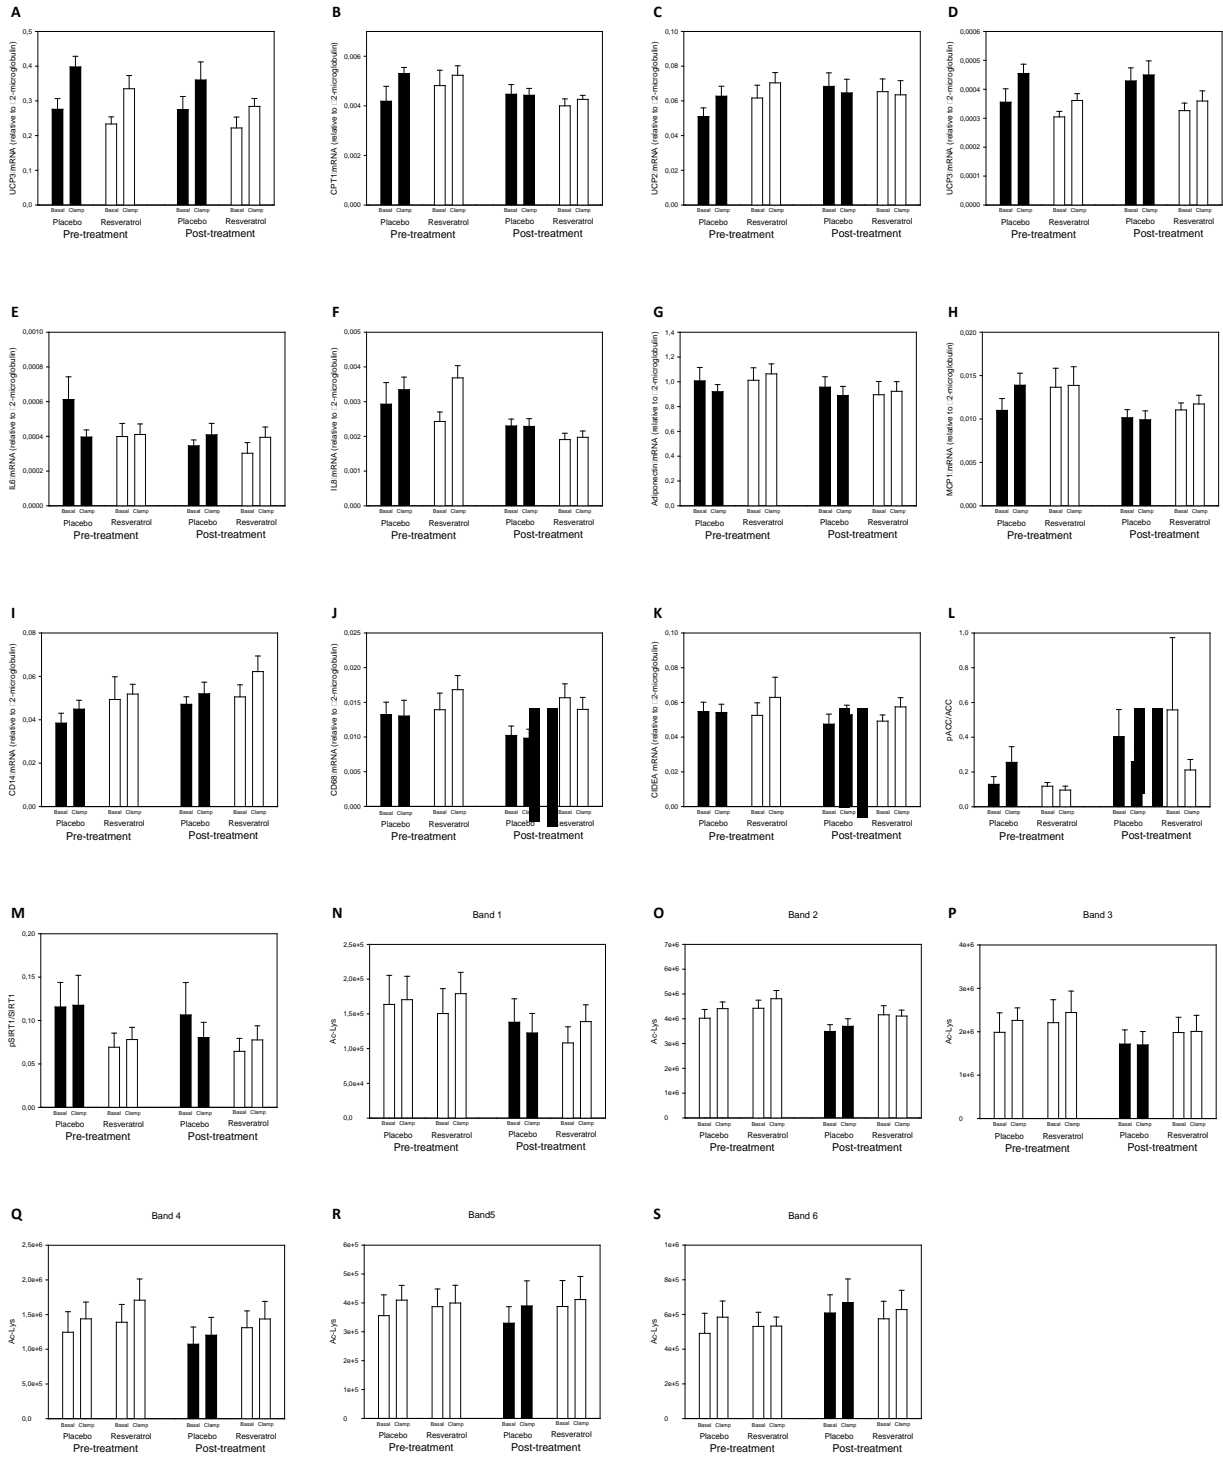

Supplement: supp_db12-0975_DB120975SupplementaryData.pdf [file supp_db12-0975_DB120975SupplementaryData.pdf]
